# Supplementary material for: Biodemulsifiers produced by Achromobacter sp. and their features in improving the biodegradation of phenanthrene
Source: Royal Society of Chemistry journal article supplement (doi:10.1039/c6ra25167f), 2017-01-01
Supplement: c6ra25167f1.pdf [file c6ra25167f1.pdf]

**Date: November 25, 2016**

**Submitted to: RSC ADVANCES**

**Manuscript Number: RA-ART-10-2016-025167**

## **Supplementary Material**

### **Biodemulsifiers produced by *Achromobacter* sp. and their features in improving the biodegradation of Phenanthrene**

*Chunyan Li, Tingting Jia, Meng Fu, Ning Hou\*, Huiming Cao, Qiaoruo Wang,  
Dapeng Li*

College of Resources and Environment, Northeast Agricultural University, Harbin  
150030, China

\*Corresponding author Tel.: +86 451 55190034, E-mail address:  
houning571@163.com

Supplementary Material: 4 tables

**Table S1**

Levels of various factors affecting the demulsification of W/O-model emulsions

| Factor | Name                       | Units              | Low (-1) | Mid (0) | High (1) |
|--------|----------------------------|--------------------|----------|---------|----------|
| A      | temperature                | °C                 | 30       | 33      | 36       |
| B      | concentration of substrate | mg·L <sup>-1</sup> | 50       | 75      | 100      |
| C      | pH                         |                    | 6        | 7       | 8        |
| D      | inoculum size              |                    | 3        | 4       | 5        |

**Table S2**

RSM experimental design and results for strain LH-1 for the demulsification efficiency for the W/O-model emulsion (%)

| Run | Factors |    |    |    | Response Y |
|-----|---------|----|----|----|------------|
|     | A       | B  | C  | D  |            |
| 1   | 0       | 0  | -1 | 1  | 80.23      |
| 2   | 1       | 1  | 0  | 0  | 58.67      |
| 3   | 0       | -1 | 0  | 1  | 73.38      |
| 4   | 0       | -1 | -1 | 0  | 61.38      |
| 5   | -1      | -1 | 0  | 0  | 74.84      |
| 6   | -1      | 0  | -1 | 0  | 80.57      |
| 7   | 1       | 0  | -1 | 0  | 74.12      |
| 8   | 0       | 0  | -1 | -1 | 80.32      |
| 9   | 1       | 0  | 1  | 0  | 79.22      |
| 10  | 0       | 1  | 0  | -1 | 61.68      |
| 11  | 0       | 0  | 0  | 0  | 92.25      |
| 12  | 0       | 0  | 0  | 0  | 94.45      |
| 13  | 0       | 0  | 0  | 0  | 94.28      |
| 14  | 1       | -1 | 0  | 0  | 69.13      |
| 15  | -1      | 0  | 1  | 0  | 79.93      |
| 16  | 1       | 0  | 0  | -1 | 87.55      |
| 17  | 0       | 0  | 0  | 0  | 93.37      |
| 18  | 0       | 0  | 1  | 1  | 80.35      |
| 19  | 0       | -1 | 1  | 0  | 66.85      |
| 20  | -1      | 1  | 0  | 0  | 55.87      |
| 21  | -1      | 0  | 0  | 1  | 88.77      |
| 22  | 1       | 0  | 0  | 1  | 81.32      |
| 23  | 0       | 0  | 0  | 0  | 93.94      |
| 24  | 0       | 1  | 1  | 0  | 50.68      |
| 25  | 0       | 1  | -1 | 0  | 51.86      |

|    |    |    |   |    |       |
|----|----|----|---|----|-------|
| 26 | -1 | 0  | 0 | -1 | 85.95 |
| 27 | 0  | 0  | 1 | -1 | 85.98 |
| 28 | 0  | -1 | 0 | -1 | 73.48 |
| 29 | 0  | 1  | 0 | 1  | 59.34 |

**Table S3**

Analysis of variance (ANOVA) for the response surface quadratic model of demulsification for the W/O-model emulsion by LH-1

| Source                        | SS      | df | Mean square | F-value | p-value |                 |
|-------------------------------|---------|----|-------------|---------|---------|-----------------|
| Model                         | 4990.07 | 14 | 356.43      | 288.99  | <0.0001 | significant     |
| A                             | 18.55   | 1  | 18.55       | 15.04   | 0.0017  |                 |
| B                             | 544.86  | 1  | 544.86      | 441.76  | <0.0001 |                 |
| C                             | 20.02   | 1  | 20.02       | 16.23   | 0.0012  |                 |
| D                             | 11.29   | 1  | 11.29       | 9.15    | 0.0091  |                 |
| AB                            | 18.11   | 1  | 18.11       | 14.68   | 0.0018  |                 |
| AC                            | 11.36   | 1  | 11.36       | 9.21    | 0.0089  |                 |
| AD                            | 20.48   | 1  | 20.48       | 16.60   | 0.0011  |                 |
| BC                            | 11.06   | 1  | 11.06       | 8.96    | 0.0097  |                 |
| BD                            | 1.14    | 1  | 1.14        | 0.93    | 0.3517  |                 |
| CD                            | 7.76    | 1  | 7.76        | 6.29    | 0.0251  |                 |
| A <sup>2</sup>                | 156.98  | 1  | 156.98      | 127.28  | <0.0001 |                 |
| B <sup>2</sup>                | 4023.14 | 1  | 4023.14     | 3261.88 | <0.0001 |                 |
| C <sup>2</sup>                | 711.33  | 1  | 711.33      | 576.73  | <0.0001 |                 |
| D <sup>2</sup>                | 32.90   | 1  | 32.90       | 26.67   | 0.0001  |                 |
| Residual                      | 17.27   | 14 | 1.23        |         |         |                 |
| Lack of Fit                   | 13.80   | 10 | 1.38        | 1.59    | 0.3470  | not significant |
| Pure Error                    | 3.47    | 4  | 0.87        |         |         |                 |
| Cor. Total                    | 5007.34 | 28 |             |         |         |                 |
| R <sup>2</sup>                | 0.9966  |    |             |         |         |                 |
| R <sup>2</sup> <sub>Adj</sub> | 0.9931  |    |             |         |         |                 |
| Pred. R-Squared               | 0.9830  |    |             |         |         |                 |
| Adeq. Precision               | 53.192  |    |             |         |         |                 |

df: degrees of freedom; SS: sum of squares

**Table S4**

Growth and demulsification activity of LH-1 grown on different chlorinated aliphatics  
hydrocarbons (CAHs) carbon source

| Carbon source   | Growth (OD=600 nm) | Demulsification rate (W/O) (%) |
|-----------------|--------------------|--------------------------------|
| Liquid paraffin | 0.83±0.2           | 96.27%±0.1%                    |
| Frying oil      | 0.78±0.1           | 93.45%±0.2%                    |
| n-Hexadecane    | 0.69±0.1           | 83.16%±0.1%                    |
